# Supplementary material for: CdS nanorods assisted thermal oxidation of polythiol segments of PS-b-polythiols to produce core cross-linking micellar clusters
Source: Royal Society of Chemistry journal article supplement (doi:10.1039/c4py00946k), 2014-08-26
Supplement: c4py00946k1.pdf [file c4py00946k1.pdf]

Supporting information

**CdS nanoparticles assisting thermal oxidation of polythiols segments of PS-b-Polythiols to produce core cross-linking micellar clusters**

| Peak | Position (eV) |                        |                         |                |
|------|---------------|------------------------|-------------------------|----------------|
|      | CdS           | OP <sub>Cds</sub> (0h) | OP <sub>Cds</sub> (16h) | PS-b-polythiol |
| I    | 161.14        | 161.57                 | 161.58                  |                |
| II   | 162.35        | 162.67                 | 162.74                  |                |
| III  | 163.44        | 163.44                 | 163.76                  | 163.9          |
| IV   | 164.44        | 164.54                 | 164.86                  | 165.12         |
| V    | 167.84        | 168.43                 | 168.33                  |                |
| VI   | 168.84        | 169.53                 | 169.39                  |                |

| Peak | Area (eV) |                        |                         |                |
|------|-----------|------------------------|-------------------------|----------------|
|      | CdS       | OP <sub>Cds</sub> (0h) | OP <sub>Cds</sub> (16h) | PS-b-polythiol |
| I    | 20434.1   | 6993.5                 | 3731.9                  |                |
| II   | 10217     | 3496.8                 | 1866                    |                |
| III  | 1082.5    | 2123.7                 | 1054                    | 2792.1         |
| IV   | 538       | 1061.8                 | 527                     | 1384.6         |
| V    | 2462.8    | 1487.9                 | 814.4                   |                |
| VI   | 1231.4    | 744                    | 407.2                   |                |

| Doublet            | Area ratio |                        |                         |                |
|--------------------|------------|------------------------|-------------------------|----------------|
|                    | CdS        | OP <sub>Cds</sub> (0h) | OP <sub>Cds</sub> (16h) | PS-b-polythiol |
| Area(II)/Area(I)   | 2          | 2                      | 2                       |                |
| Area(IV)/Area(III) | 2          | 2                      | 2                       | 2              |
| Area(VI)/Area(V)   | 2          | 2                      | 2                       |                |

| Doublet        | Separation (eV) |                        |                         |                |
|----------------|-----------------|------------------------|-------------------------|----------------|
|                | CdS             | OP <sub>Cds</sub> (0h) | OP <sub>Cds</sub> (16h) | PS-b-polythiol |
| BE(II)-BE(I)   | 1.21            | 1.1                    | 1.16                    |                |
| BE(IV)-BE(III) | 1               | 1.1                    | 1.1                     | 1.22           |
| BE(VI)-BE(V)   | 1               | 1.1                    | 1.06                    |                |

| Doublet                                       | Area ratio |                        |                         |                |
|-----------------------------------------------|------------|------------------------|-------------------------|----------------|
|                                               | CdS        | OP <sub>Cds</sub> (0h) | OP <sub>Cds</sub> (16h) | PS-b-polythiol |
| (Area(IV)+Area(III))/<br>((Area(II)+Area(I))) | 0.05       | 0.3                    | 0.28                    |                |
| (Area(IV)+Area(III))/<br>((Area(II)+Area(I))) | 0.12       | 0.21                   | 0.22                    |                |

**Table.S1** Peaks' parameters of XPS of S2p fitted with a software called XPS peak (fitted with Lorentzian-Gaussian shaped peaks, L/G=20%), (peak I, II), (peak III, IV) and (peak V, VI) were assigned to S<sup>2-</sup>, -SH or -S-S-, -SO<sub>3</sub><sup>-</sup>, respectively.
